# Supplementary material
Source: Springer Nature journal article supplement (https://www.springermedizin.de/resource/supplementary/12889_2011_4352_MOESM8_ESM.pdf/9491834)
Supplement: MOESM8 [file 9491834]

Additional file 8: Crude prevalence (%) of noncommunicable diseases among adults aged 18 or higher living in 41 low- and middle-income countries, by education, World Health Survey 2002-04

|       |                     | Angina                          |        |      | Arthritis |        |      | Asthma   |        |      | Depression |        |      | Diabetes |        |     | Co-morbidity |        |      |      |
|-------|---------------------|---------------------------------|--------|------|-----------|--------|------|----------|--------|------|------------|--------|------|----------|--------|-----|--------------|--------|------|------|
|       |                     |                                 |        |      |           |        |      |          |        |      |            |        |      |          |        |     |              |        |      |      |
|       |                     | Estimate                        | 95% CI |      | Estimate  | 95% CI |      | Estimate | 95% CI |      | Estimate   | 95% CI |      | Estimate | 95% CI |     | Estimate     | 95% CI |      |      |
| Men   | Middle-income group | No formal schooling             | 8.2    | 6.8  | 9.7       | 10.9   | 8.7  | 13.1     | 15.1   | 12.1 | 18.0       | 10.1   | 7.4  | 12.8     | 5.8    | 3.7 | 8.0          | 15.5   | 12.5 | 18.5 |
|       |                     | Less than primary school        | 8.6    | 7.3  | 9.8       | 9.3    | 7.7  | 10.9     | 9.5    | 7.7  | 11.2       | 4.2    | 3.1  | 5.3      | 3.4    | 2.5 | 4.3          | 9.3    | 7.7  | 10.9 |
|       |                     | Primary school completed        | 6.4    | 5.5  | 7.4       | 7.7    | 6.6  | 8.9      | 8.2    | 7.2  | 9.2        | 4.9    | 3.9  | 5.9      | 3.9    | 3.0 | 4.9          | 8.2    | 7.1  | 9.4  |
|       |                     | Secondary/high school completed | 6.4    | 5.8  | 7.0       | 7.0    | 6.0  | 7.9      | 6.4    | 5.5  | 7.4        | 2.9    | 2.3  | 3.5      | 2.3    | 1.9 | 2.8          | 5.5    | 4.7  | 6.3  |
|       |                     | College completed or above      | 5.8    | 4.8  | 6.7       | 7.6    | 6.0  | 9.2      | 5.6    | 4.1  | 7.1        | 3.4    | 2.3  | 4.5      | 2.2    | 1.6 | 2.9          | 6.7    | 5.1  | 8.3  |
|       | Low-income group    | No formal schooling             | 14.3   | 12.9 | 15.7      | 6.9    | 5.9  | 7.8      | 8.3    | 7.2  | 9.3        | 7.2    | 6.2  | 8.1      | 1.3    | 0.9 | 1.7          | 8.5    | 7.4  | 9.5  |
|       |                     | Less than primary school        | 11.3   | 9.8  | 12.9      | 5.3    | 4.3  | 6.3      | 6.6    | 5.4  | 7.8        | 5.8    | 4.7  | 6.8      | 2.2    | 1.4 | 3.0          | 7.2    | 5.9  | 8.5  |
|       |                     | Primary school completed        | 8.1    | 7.1  | 9.2       | 4.0    | 3.2  | 4.9      | 5.1    | 4.2  | 5.9        | 4.8    | 3.9  | 5.7      | 2.0    | 1.3 | 2.6          | 4.4    | 3.6  | 5.2  |
|       |                     | Secondary/high school completed | 6.9    | 5.9  | 8.0       | 3.6    | 2.7  | 4.4      | 3.4    | 2.7  | 4.1        | 3.0    | 2.3  | 3.7      | 1.7    | 1.3 | 2.1          | 3.1    | 2.4  | 3.8  |
|       |                     | College completed or above      | 5.2    | 3.2  | 7.1       | 2.2    | 1.3  | 3.1      | 4.2    | 2.8  | 5.7        | 6.3    | 1.5  | 11.1     | 3.7    | 2.3 | 5.1          | 2.7    | 1.5  | 3.8  |
| Women | Middle-income group | No formal schooling             | 24.3   | 21.7 | 26.8      | 14.7   | 12.9 | 16.5     | 12.7   | 10.6 | 14.8       | 16.3   | 13.8 | 18.7     | 9.1    | 7.5 | 10.8         | 20.8   | 18.5 | 23.1 |
|       |                     | Less than primary school        | 23.9   | 21.2 | 26.6      | 12.7   | 10.6 | 14.7     | 13.0   | 10.0 | 15.9       | 8.0    | 6.4  | 9.7      | 7.9    | 6.2 | 9.6          | 15.5   | 13.1 | 18.0 |
|       |                     | Primary school completed        | 18.8   | 17.1 | 20.5      | 10.8   | 9.6  | 12.0     | 8.6    | 7.6  | 9.7        | 6.7    | 5.6  | 7.8      | 5.9    | 4.9 | 6.9          | 11.8   | 10.5 | 13.2 |
|       |                     | Secondary/high school completed | 17.9   | 16.3 | 19.5      | 10.0   | 8.9  | 11.2     | 7.6    | 6.7  | 8.6        | 5.2    | 4.4  | 5.9      | 3.5    | 3.0 | 4.1          | 10.2   | 8.8  | 11.5 |
|       |                     | College completed or above      | 16.6   | 14.2 | 18.9      | 10.9   | 9.2  | 12.6     | 7.2    | 5.0  | 9.4        | 5.2    | 3.9  | 6.6      | 3.6    | 1.7 | 5.6          | 9.9    | 7.7  | 12.1 |
|       | Low-income group    | No formal schooling             | 19.6   | 18.2 | 20.9      | 9.4    | 8.5  | 10.2     | 7.1    | 6.4  | 7.9        | 11.4   | 10.4 | 12.5     | 2.2    | 1.7 | 2.7          | 11.1   | 10.2 | 12.0 |
|       |                     | Less than primary school        | 14.7   | 13.0 | 16.4      | 7.0    | 5.9  | 8.2      | 5.3    | 4.4  | 6.3        | 8.1    | 6.7  | 9.5      | 1.8    | 1.0 | 2.5          | 7.6    | 6.3  | 8.8  |
|       |                     | Primary school completed        | 11.5   | 10.2 | 12.8      | 5.2    | 4.3  | 6.1      | 4.6    | 3.6  | 5.5        | 6.5    | 5.6  | 7.5      | 2.2    | 1.4 | 3.0          | 5.1    | 4.3  | 6.0  |
|       |                     | Secondary/high school completed | 9.8    | 8.3  | 11.3      | 4.2    | 3.1  | 5.3      | 3.5    | 2.7  | 4.4        | 3.9    | 3.0  | 4.8      | 1.5    | 0.9 | 2.1          | 3.7    | 2.8  | 4.6  |
|       |                     | College completed or above      | 6.0    | 3.8  | 8.1       | 3.8    | 1.9  | 5.6      | 2.8    | 1.3  | 4.2        | 2.4    | 1.1  | 3.8      | 1.6    | 0.7 | 2.5          | 2.1    | 1.1  | 3.2  |
